# Supplementary material for: The Antiproliferative and Apoptosis-Inducing Effects of the Red Macroalgae Gelidium latifolium Extract against Melanoma Cells
Source: MDPI journal article supplement (doi:10.3390/molecules26216568), 2021-10-30
Supplement: s1 [file s1]

## Supplementary material.

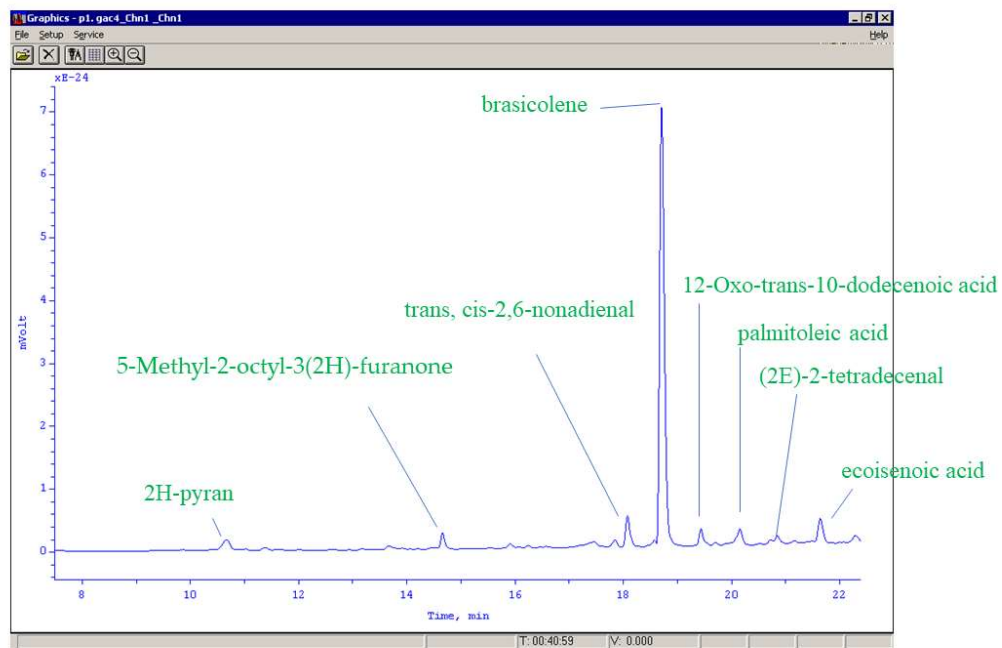

**Figure S1.** HPLC analysis on GLE determined that brassicolene was substantially more present as a prominent peak than the others. The majority of the substances were fatty acid putatives, trans, cis-2,6-nonadienal; 12-Oxo-trans-10-dodecenoic acid; palmitoleic acid, (2E)-2-tetradecenal, and ecoisenoic acid. In addition, 2H-pyran and furanone were also detected.

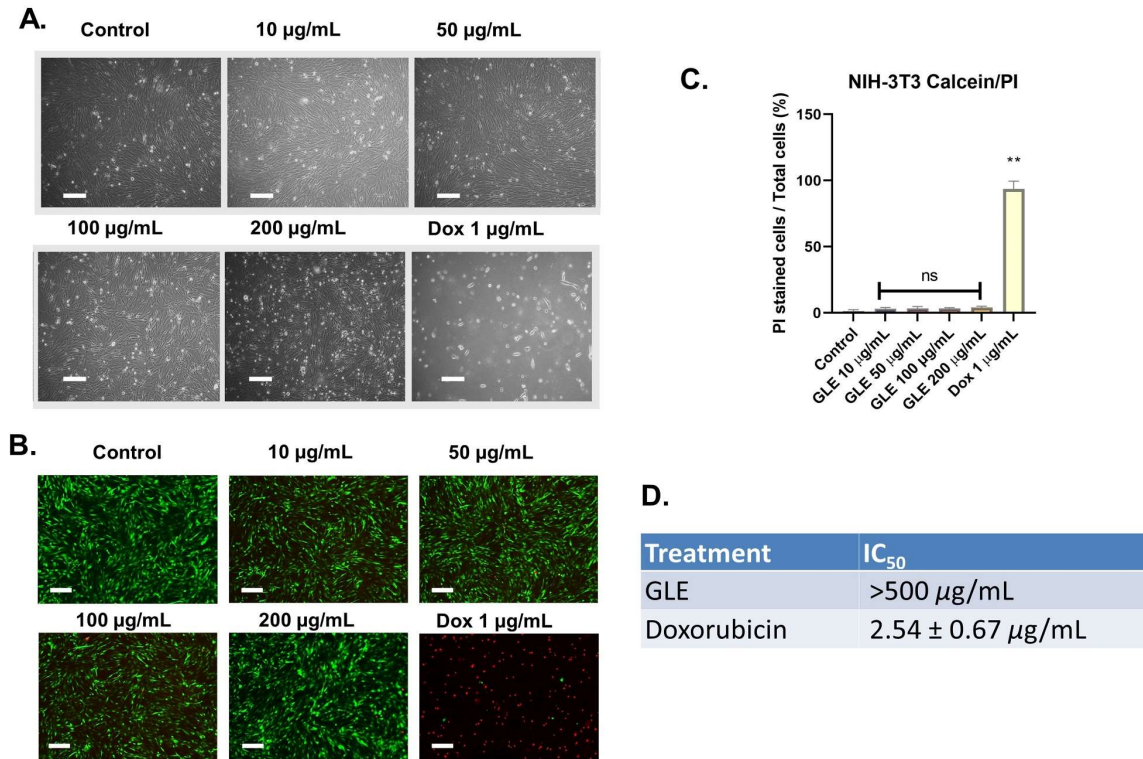

**Figure S2.** Cytotoxic effects of GLE in NIH-3T3 normal fibroblast cells treated for 72 h. A. Morphological observation of NIH-3T3 fibroblast cells after GLE and doxorubicin for 72h, scale = 50  $\mu\text{m}$ , B. Viability staining with Calcein-AM (green) and PI (red) in NIH-3T3 fibroblast cells treated with GLE or Doxorubicin for 72h, C. The percentage of PI-stained cells that are dead cells. D. Respective IC<sub>50</sub> values of GLE and Doxorubicin against NIH-3T3 fibroblast cells. \*\* indicates significant difference ( $p < 0.01$ ) compared to control. ns indicates no significant difference compared to control group. Scale=100  $\mu\text{m}$ .
